# Supplementary material
Source: Springer Nature journal article supplement (https://www.springerprofessional.de/resource/supplementary/40008_2013_18_MOESM4_ESM.lsp/11899454)
Supplement: MOESM4 [file 11899454]

// triangulate_iot_cmp.lsp --- Simultaneous triangulation of IOTs
//
// Input-data file contains IOTs to be triangulated in the SSV format,
// where SSV refers to space-separated values.
//
// The number of sectors, NSec, the number of IOTs, NTab, and the name
// of input-data file, inFile, must always be provided.
//
// The optimal rankings are printed to the standard output.

function input() {
  usage = "\n"
    + "Usage: localsolver triangulate_iot.lsp NSec=number_of_sectors"
    + " NTab=number_of_tables"
    + " inFile=DataFileName"
    + " [lsTimeLimit=timeLimit]\n";

  if (NTab == nil || NSec == nil || inFile == nil) {
    error(usage);
  }
  NT = NTab - 1;
  NS = NSec - 1;

  inFile = openRead(inFile);
  datum[0..(NTab*NSec*NSec - 1)] = readDouble(inFile);

  denom[s in 0..NT] <- sum[i in 0..NS][j in 0..NS : i != j](datum[NSec * NSec * s + NSec * i + j]);
}

function model() {
  // p[s][i][j] == 1 if sector i is at the j-th position
  p[0..NT][0..NS][0..NS] <- bool();

  // one sector per position j
  for [s in 0..NT][j in 0..NS] {
    constraint sum[i in 0..NS](p[s][i][j]) == 1;
  }
  // one position per sector i
  for [s in 0..NT][i in 0..NS] {
    constraint sum[j in 0..NS](p[s][i][j]) == 1;
  }

  // sec[s][j] is sector at the j-th position.
  sec[s in 0..NT][j in 0..NS] <- min(NS, max(0, sum[i in 0..NS](i * p[s][i][j])));

  // rank[s][i] is ranking of the i-th sector.
  rank[s in 0..NT][i in 0..NS] <- min(NS, max(0, sum[j in 0..NS](j * p[s][i][j])));

  for [s in 0..NT] {
    DegLin[s] <- sum[i in 1..NS][j in 0..i-1](datum[NSec * NSec * s + NSec * sec[s][i] + sec[s][j]]) / denom[s];
  }

  Q <- sum[s in 1..NT][t in 0..s-1][i in 1..NS][j in 0..i-1](
      (rank[s][i] > rank[s][j]) * (rank[t][i] > rank[t][j])
      + (rank[s][i] < rank[s][j]) * (rank[t][i] < rank[t][j])
      - (rank[s][i] > rank[s][j]) * (rank[t][i] < rank[t][j])
      - (rank[s][i] < rank[s][j]) * (rank[t][i] > rank[t][j])
    );
  // Kendall <- 1 - 4 * Q / NSec / (NSec - 1 ) / (NTab * (NTab - 1) / 2);

  for [s in 0..NT] {
    maximize DegLin[s];
  }
  minimize Q;
}


function param() {
  if (lsTimeLimit == nil) lsTimeLimit = 20;
}


function output() {
  for [j in 0..NS] {
    for [s in 0..NT] {
      print((getValue(rank[s][j]) + 1) + "\t");
    }
    println();
  }
}
